# Supplementary material for: Shape-selective synthesis and facet-dependent electrocatalytic activity of CoPt3 nanocrystals
Source: Royal Society of Chemistry journal article supplement (doi:10.1039/c2ce25088h), 2012-01-01

## Supporting Information:

### Shape-Selective Synthesis and Facet-Dependent Electrocatalytic Activity of CoPt<sub>3</sub> Nanocrystals

*Xintao Luo, Yi Liu, Hao Zhang\*, and Bai Yang*

State Key Laboratory of Supramolecular Structure and Materials,  
College of Chemistry, Jilin University, Changchun 130012, P. R. China  
Fax: (+86) 431-85193423  
E-mail: hao\_zhang@jlu.edu.cn

#### **This file includes:**

Experimental Section

Figures S1 to S4

Table S1 and S2

Captions for Figures S1 to S4

Captions for Table S1 and S2

## Experimental Section

Platinum(II) acetylacetonate (48.0% Pt, Pt(acac)<sub>2</sub>) and cobalt(II) acetylacetonate (22.5% Co, Co(acac)<sub>2</sub>) were purchased from Alfa Aesar. Oleic acid (90%, OA), oleylamine (70%, OLA), 1,2-hexadecandiol (90%) and benzyl ether (99%) were obtained from Sigma-Aldrich. Chloroform, ethanol, methanol, perchloric acid, sulfuric acid, and formic acid were all analytical grade, and purchased from Beijing Chemical Reagent Ltd, China. All the reagents were used as received without further purification.

CoPt<sub>3</sub> NCs with different shapes were synthesized via a non-injection method using benzyl ether as the solvent. Typically, 0.033g Pt(acac)<sub>2</sub>, 0.039g Co(acac)<sub>2</sub>, 1.4mL OLA, 0.6mL OA, 0.260g 1,2-hexadecandiol, and 5ml benzyl ether were loaded into a three-neck flask. The mixture was under vacuum to remove O<sub>2</sub> at room temperature, and water at 60°C. Subsequently, the system was heated up to 220°C under nitrogen atmosphere and maintained for 1h to obtain flowerlike CoPt<sub>3</sub> NCs. Following a similar method, except altering the OLA-to-OA ratio, spherical and cubic NCs were synthesized. The as-synthesized CoPt<sub>3</sub> NCs were precipitated with ethanol for two times, and redispersed in chloroform.

For the electrochemistry tests, a three-electrode system was used. The gold disk electrode was used as a supporting substrate for CoPt<sub>3</sub> NCs. Ag/AgCl electrode was employed as the reference electrode. A Pt wire was used as the counter electrode. The potentials were converted to the reversible hydrogen electrode. Before the electrochemical measurements, the gold disk electrodes were carefully polished. A 10uL chloroform solution of CoPt<sub>3</sub> NCs was dropped on electrodes, and followed by chloroform evaporation to form the self-assembly films of CoPt<sub>3</sub>. The electrodes were subjected to argon plasma treatment to remove the organic ligands on CoPt<sub>3</sub>. The electrocatalytic properties of CoPt<sub>3</sub> NCs were evaluated using cyclic voltammogram (CHI 660C electrochemical analyzer, CH Instruments). The catalytic activity of NCs was normalized to the geometrical area of electrode.

**Figure S1.** Size distribution of CoPt<sub>3</sub> nanoparticles (a), CoPt<sub>3</sub> nanocubes (b), and flowerlike CoPt<sub>3</sub> (c).

The size distribution was calculated from the TEM images.

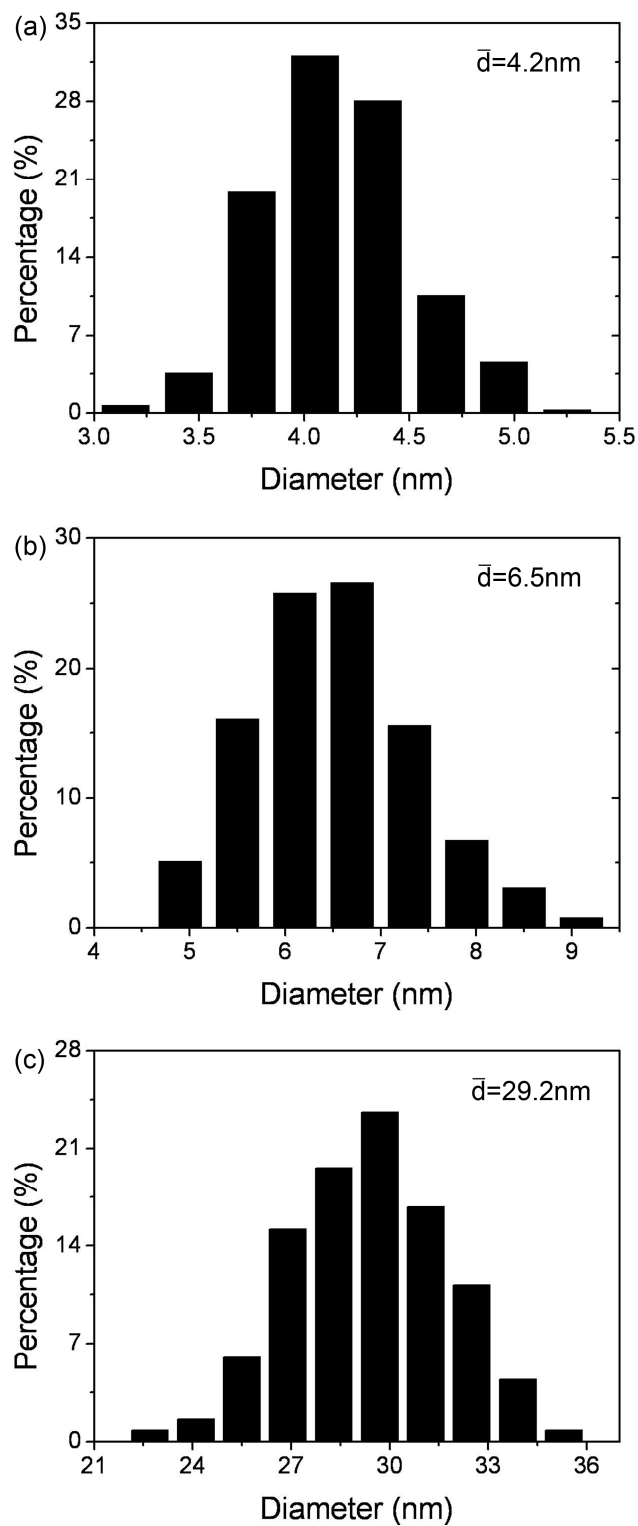

**Table S1.** The correlation of OLA-to-OA ratio, shapes of the as-synthesized CoPt<sub>3</sub> NCs, and Co-to-Pt ratio of NCs.

| OLA-to-OA ratio | Shapes of CoPt <sub>3</sub> NCs | Co-to-Pt ratio |
|-----------------|---------------------------------|----------------|
| 1:9             | nanoparticle                    | 1 : 3.01       |
| 4:6             | nanocube                        | 1 : 3.02       |
| 7:3             | nanoflower                      | 1 : 2.98       |

**Figure S2.** TEM observation of the formation of flowerlike  $\text{CoPt}_3$  NCs from preformed octapods.

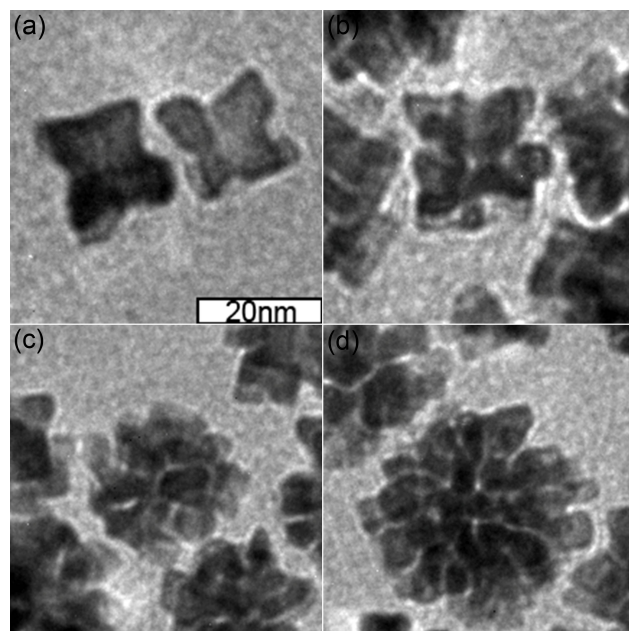

**Table S2.** Comparison of the XRD peak intensities of CoPt<sub>3</sub> NCs in different shapes, among which the (220) peaks was normalized.

| CoPt <sub>3</sub> shapes | Relative intensities of XRD peaks |       |       |       |
|--------------------------|-----------------------------------|-------|-------|-------|
|                          | (111)                             | (200) | (220) | (311) |
| nanoparticle             | 2.52                              | 1.12  | 1.00  | 1.25  |
| nanocube                 | 2.60                              | 1.20  | 1.00  | 1.13  |
| nanoflower               | 3.42                              | 1.34  | 1.00  | 1.02  |

**Figure S3.** Cyclic voltammograms of spherical (black), cubic (red), and flowerlike (green) CoPt<sub>3</sub> NCs in a mixture of 0.1M HClO<sub>4</sub> and 0.5M HCOOH. The sweep rate is 0.05V/s.

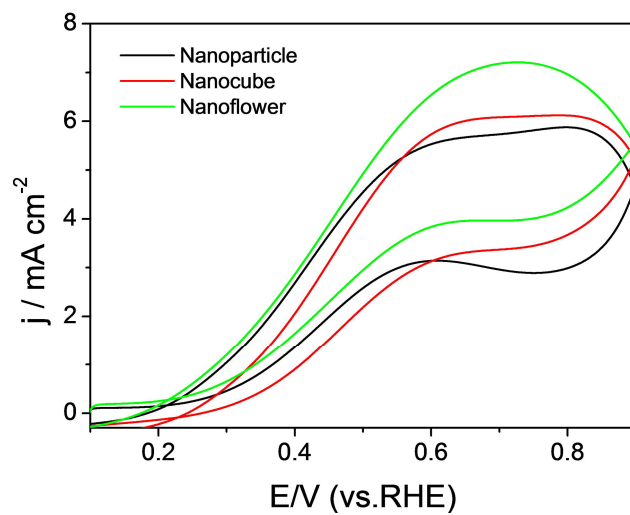

**Figure S4.** An enlarged picture of Figure 1e.

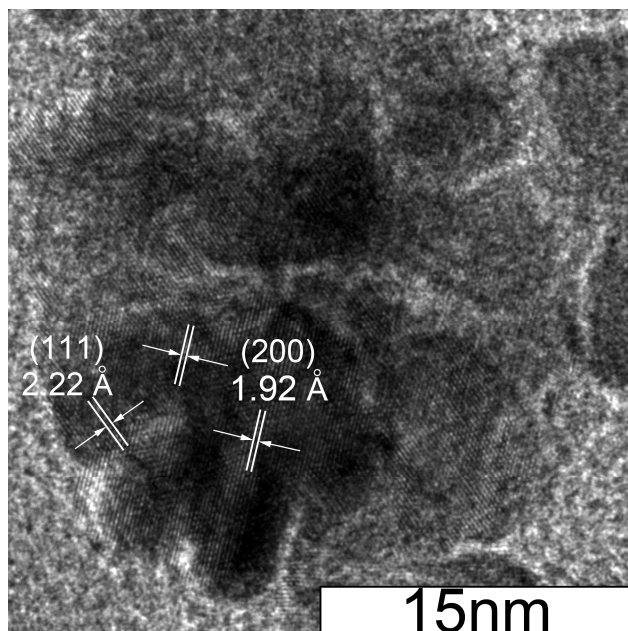

Supplement: c2ce25088h.pdf [file c2ce25088h.pdf]
